# Supplementary material for: CDC42 controlled apical-basal polarity regulates intestinal stem cell to transit amplifying cell fate transition via YAP-EGF-mTOR signaling
Source: PubMed Central journal article supplement — Cell Rep. Author manuscript; Available in PMC 2022 Feb 9. (PMC8826493; doi:10.1016/j.celrep.2021.110009), 2022-01-11
Supplement: NIHMS1771083-supplement-Supplemental_information.pdf [file NIHMS1771083-supplement-Supplemental_information.pdf]

Cell Reports, Volume 38

**Supplemental information**

**CDC42 controlled apical-basal polarity regulates  
intestinal stem cell to transit amplifying cell  
fate transition via YAP-EGF-mTOR signaling**

**Zheng Zhang, Feng Zhang, Ashley Kuenzi Davis, Mei Xin, Gerd Walz, Weidong Tian, and Yi Zheng**

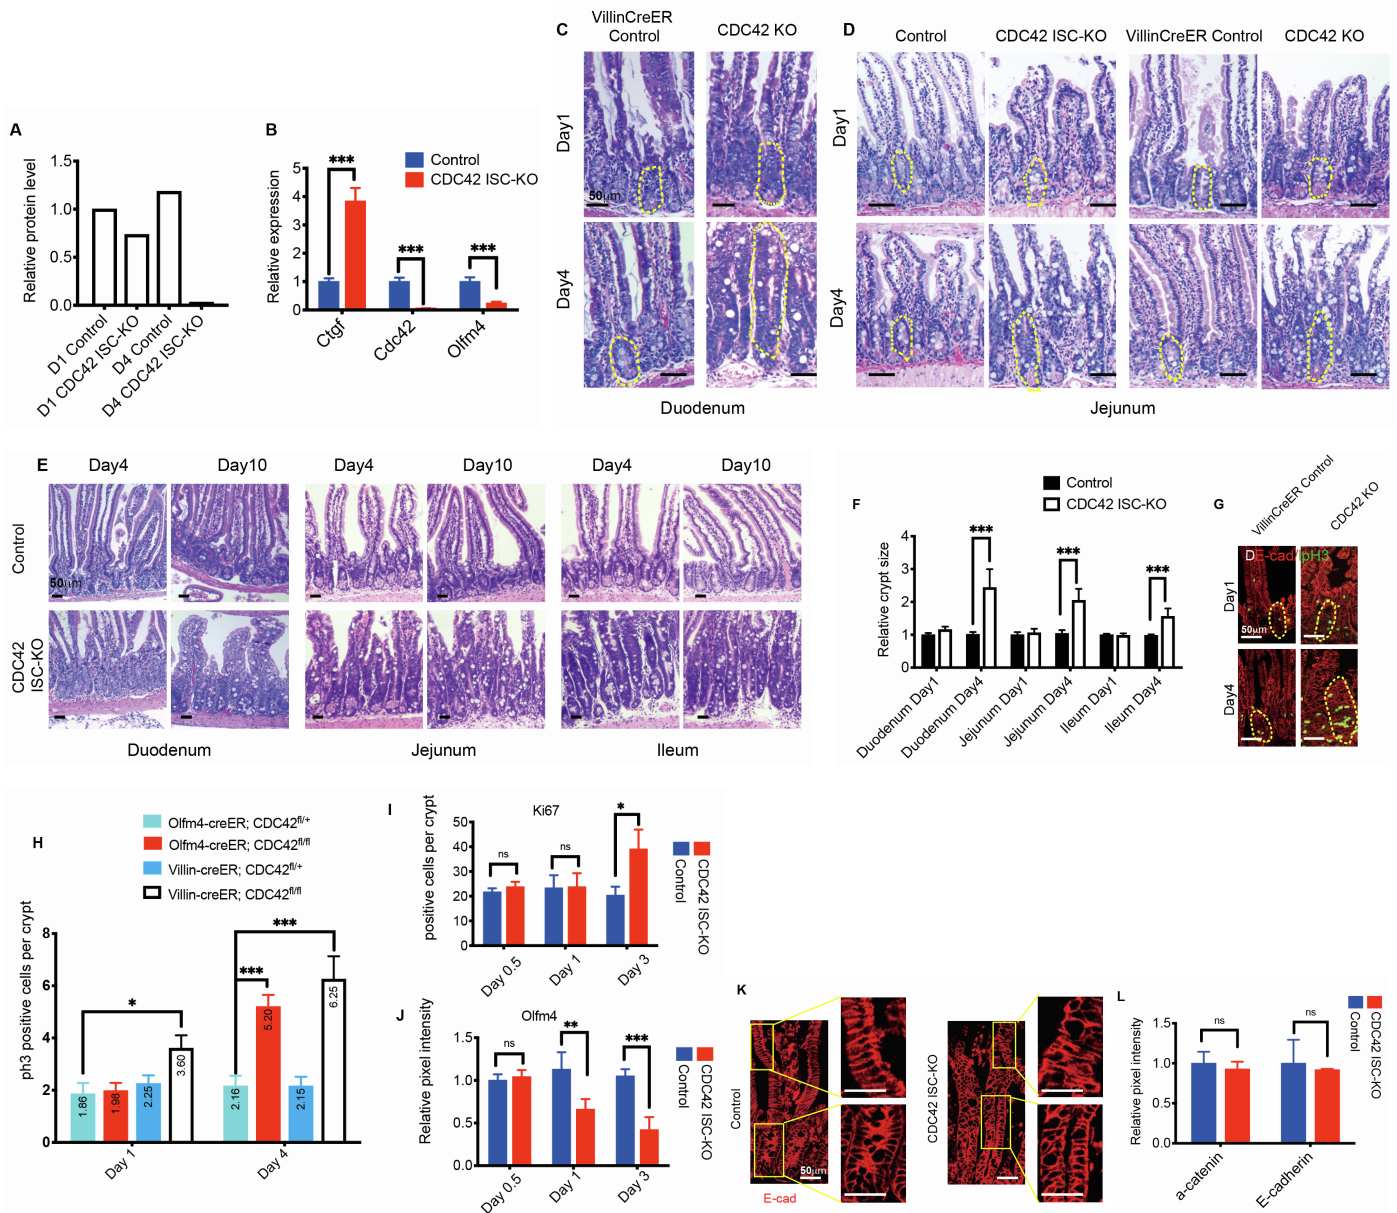

**Supplemental Figure 1. ISC-specific deletion of CDC42 mimics whole epithelium deletion in duodenum and ileum, and disrupts crypt structure.**

**Related to Figure 1**

(A) Quantification of Fig. 1A Western Blotting.

(B) Relative mRNA levels of Ctgf, CDC42 and Olfm4 in sorted GFP+ (ISCs) cells and GFP- (non-ISCs) from isolated small intestinal crypts. Data are mean  $\pm$  SD; \*\*\* $p$  < 0.005.

(C) Representative images of H&E staining of duodenal sections; 1 crypt circled in each image.

(D) Representative images of H&E staining of jejunal sections; 1 crypt circled in each image.

(E) Representative images of H&E staining of duodenal, jejunal and ileal sections;

(F) Quantification of relative crypt size. Data are mean  $\pm$  SD; \*\*\* $p$  < 0.005.

(G) Representative images of immunofluorescent staining of duodenal sections: E-cadherin and pH3; One representative crypt circled in each sample.

(H) Quantification of ph3 positive cells per crypt. Data are mean  $\pm$  SD; \* $p$  < 0.05; \*\*\* $p$  < 0.005.

(I) Quantification of Ki67 positive cells per crypt in Fig. 1H, I. Data are mean  $\pm$  SD; \* $p$  < 0.05; ns: not significant.

(J) Quantification of Olfm4 staining Fig. 1J, K. Data are mean  $\pm$  SD; ns: not significant, \*\* $p$  < 0.01; \*\*\* $p$  < 0.005.

(K) Representative images of immunofluorescent staining of duodenal sections: E-cadherin; enlargements of villi (\*) and crypt (\*\*).

(L) Quantification of a-catenin and E-cadherin. Data are mean  $\pm$  SD; ns: not significant.

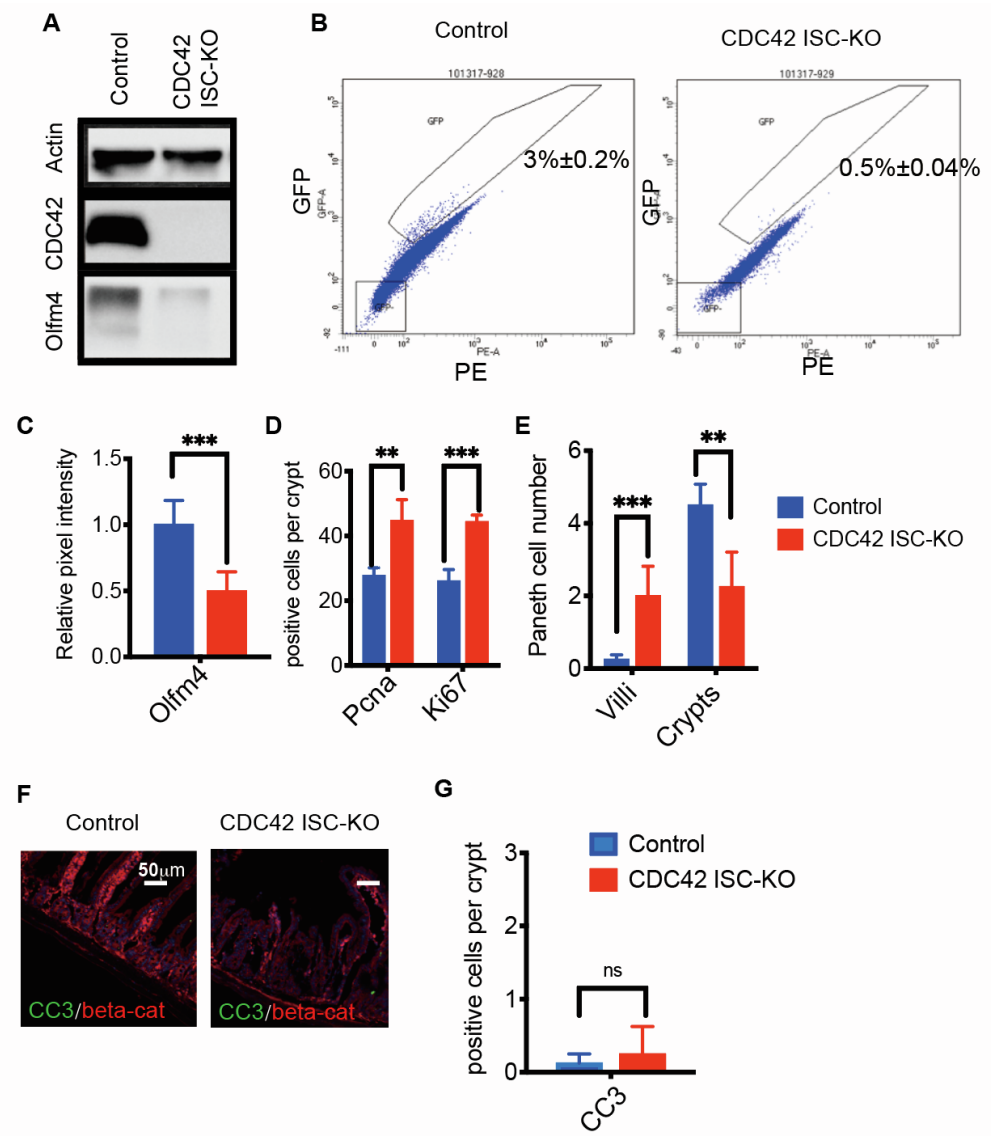

**Supplemental Figure 2. Loss of CDC42 in ISCs decreases ISCs without causing ectopic apoptosis. Related to Figure 2**

(A) Western Blotting of CDC42 and Olfm4 in isolated small intestinal crypts.

(B) Flow cytometry of Olfm4-eGFP positive cells in suspended single cells from isolated small intestinal crypts.

(C-E) Quantification of immunofluorescent staining in Fig. 2B-E. Data are mean ± SD. \*\*p < 0.01; \*\*\*p < 0.005.

(F) Representative images of immunofluorescent staining of duodenal sections: active caspase 3.

(G) Quantification of active caspase 3 positive cells per crypt. Data are mean ± SD; ns: not significant.

**A**

|                 | Control | CDC42<br>ISC-KO | YAP KO/ TAZ<br>het rescue |
|-----------------|---------|-----------------|---------------------------|
| ISCs (Lgr5)     | 5.68%   | 0.42%           | 3.17%                     |
| TA cells (Pcna) | 16.56%  | 25.03%          | 29.21%                    |

**B**

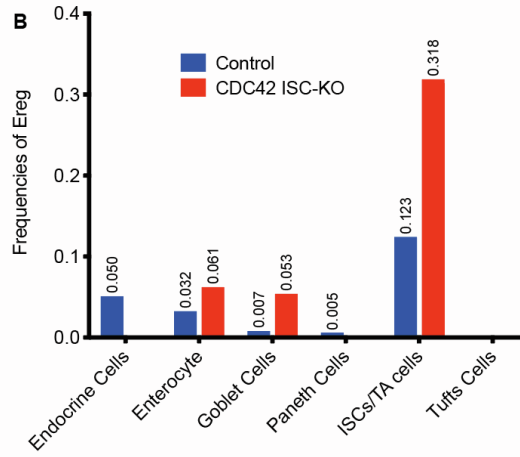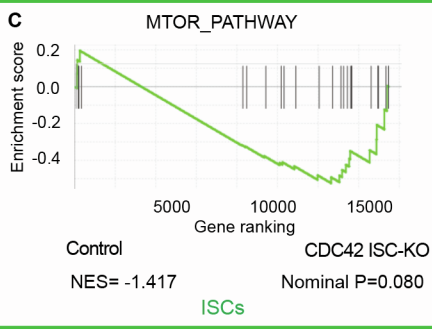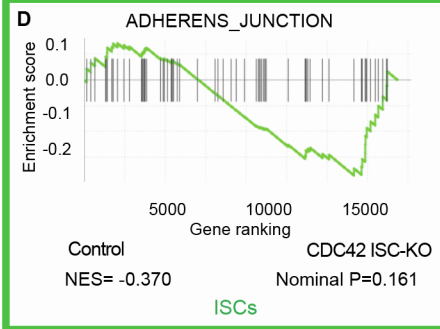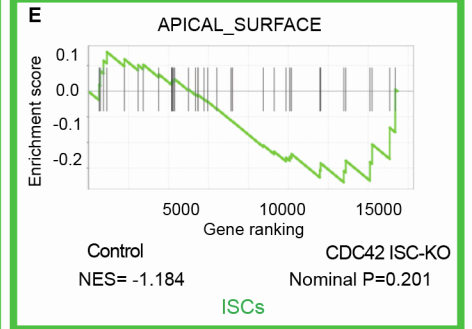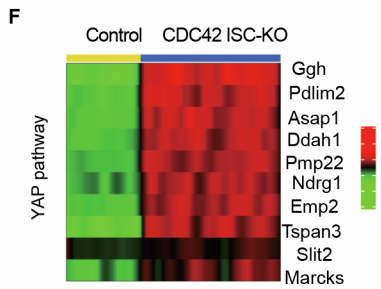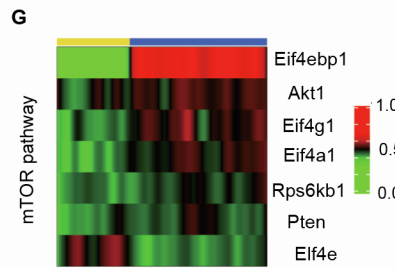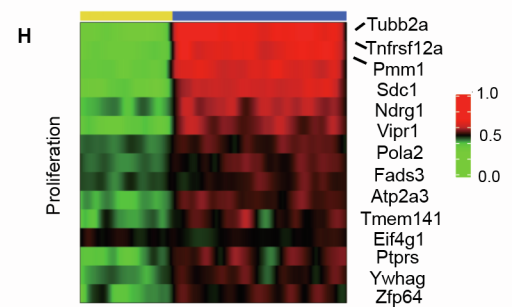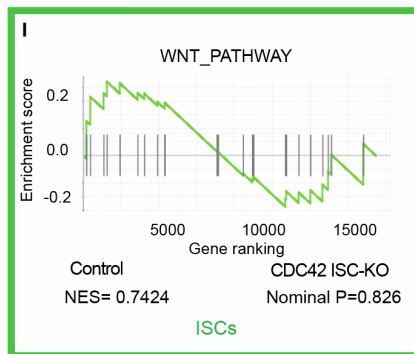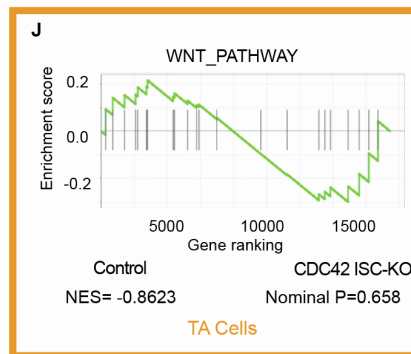

**Supplemental Figure 3. Activity of mTOR, apical surface and adhesion junction pathways are increased in CDC42-depleted ISCs, while canonical Wnt is un-altered in both ISCs and TA cells. Related to Figure 3**

(A) Percentage of ISC marker (Lgr5) and TA cell marker (Pcna) in scRNAseq analysis.

(B) Positive frequencies of Ereg in each cell clusters.

(C-E) GSEA pathway enrichment map for mTOR, apical polarity, and adhesion junction pathways in ISC cluster.

(F-H) Heatmap of most-differentially altered genes in YAP pathway (10 genes), mTOR pathway (7 genes), and proliferation pathways (14 genes) in control and CDC42 ISC-KO TA cell cluster. Columns, individual cells; rows, genes. n refers to gene numbers.

(I, J) GSEA pathway enrichment map for canonical Wnt in ISCs and TA clusters.

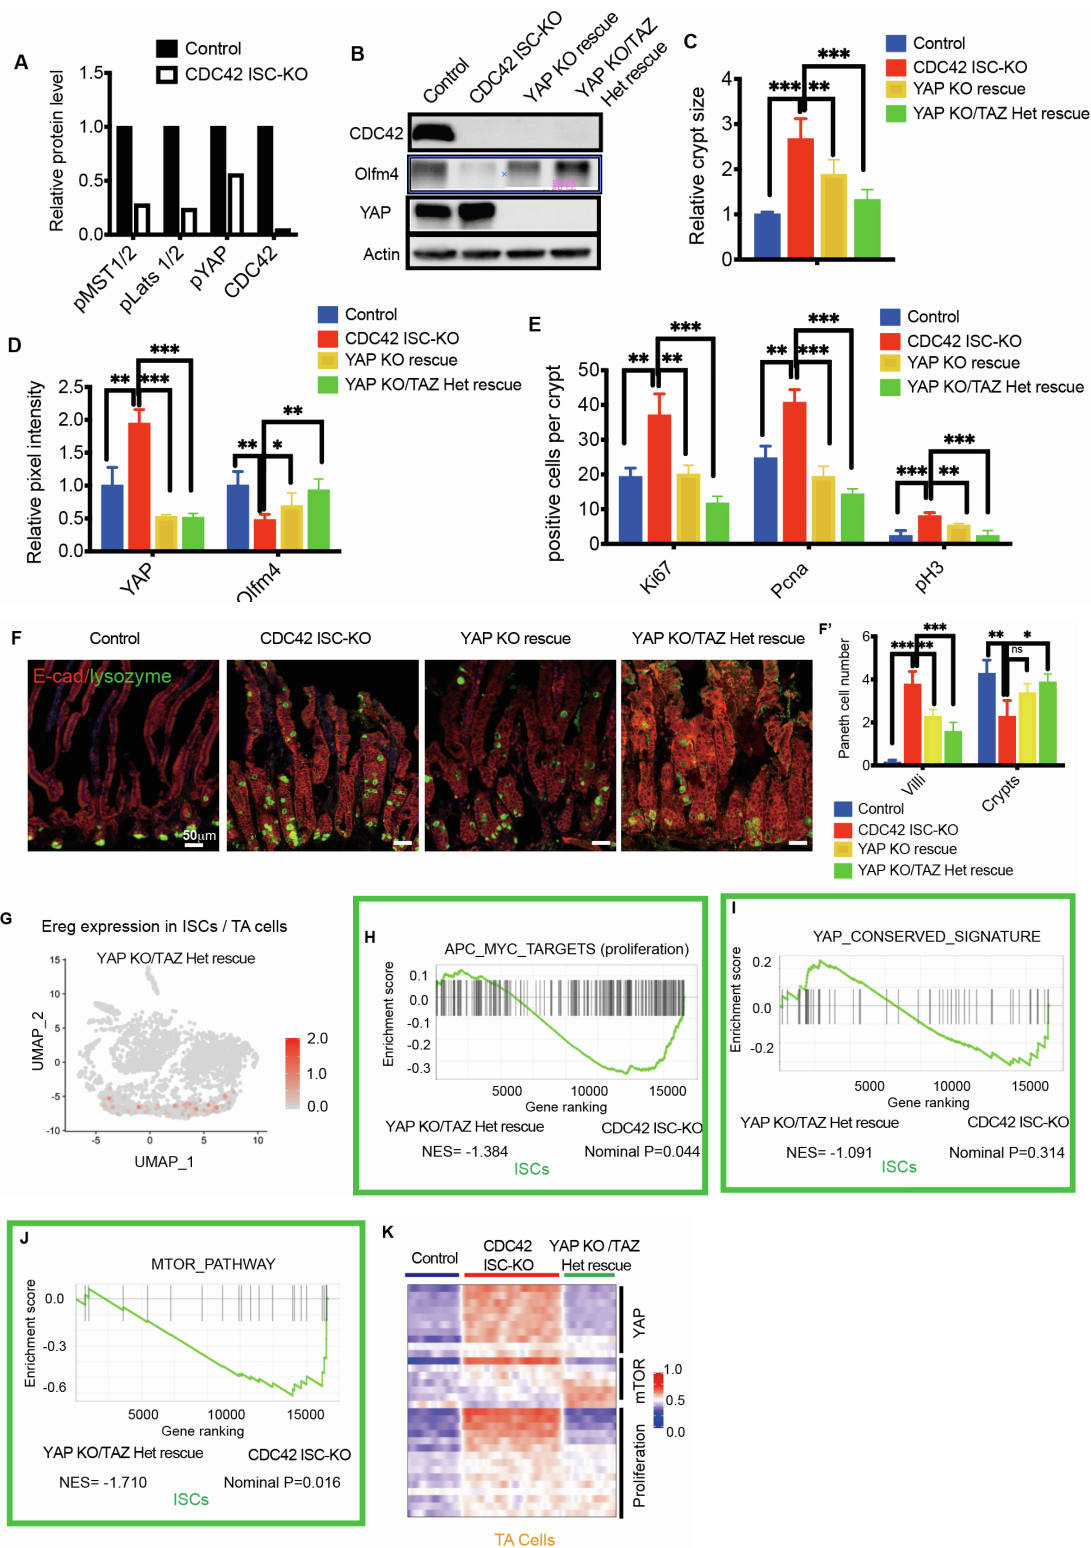

**Supplemental Figure 4. YAP KO/TAZ Het reduces Ereg expression, cell proliferation, YAP and mTOR pathways in ISCs. Related to Figure 4**

(A) Quantification of western blot in Fig. 4B.

(B) Western Blotting of CDC42 and Olfm4 in isolated small intestinal crypts.

(C) Quantification of H&E staining in Fig. 4F. Data are mean  $\pm$  SD. \*\*\* $p < 0.005$ .

(D, E) Quantification of immunofluorescent staining in Fig. 4G-K. Data are mean  $\pm$  SD. \* $p < 0.05$ ; \*\* $p < 0.01$ ; \*\*\* $p < 0.005$ .

(F) Representative images of immunofluorescent staining of duodenal sections and quantification: anti-E-cad (red), anti- lysozyme (green), and quantification of lysozyme immunofluorescent staining. Data are mean  $\pm$  SD. \* $p < 0.05$ ; \*\* $p < 0.01$ ; \*\*\* $p < 0.005$ ; ns: not significant.

(G) Expression level of Ereg in YAP KO/TAZ Het rescue ISCs and TA cells.

(H-J) GSEA pathway enrichment map for proliferation, YAP and mTOR pathways in YAP KO/TAZ Het rescue ISC cluster.

(K) Heatmap of most-differentially altered genes in YAP pathway (10 genes), mTOR pathway (7 genes) and proliferation pathways (15 genes) in control, CDC42 ISC-KO, and YAP KO/TAZ Het rescue TA cell cluster. Columns, individual cells; rows, genes. n refers to gene numbers.

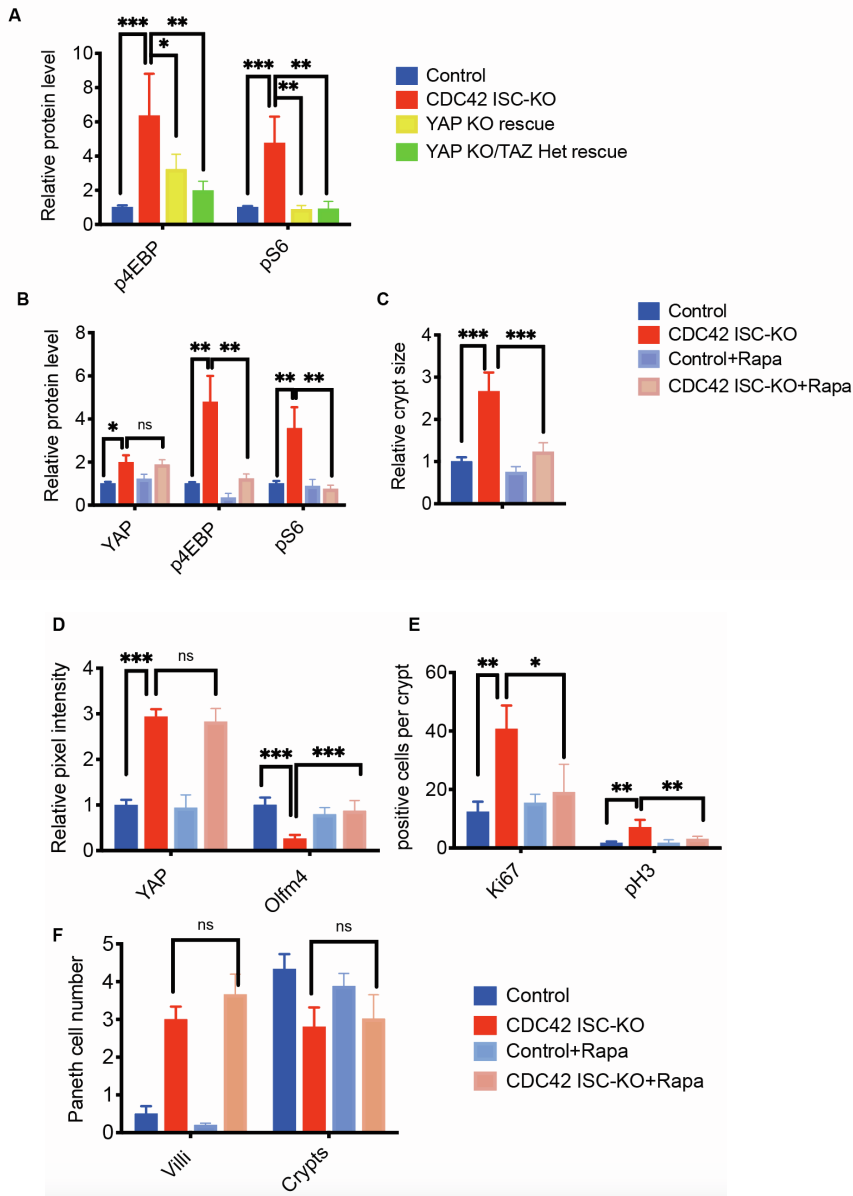

**Supplemental Figure 5. Inhibition of mTOR signaling by rapamycin rescues ISCs and reduces TA cell population. Related to Figure 5**

(A, B) Quantification of western blot in Fig. 5A, B. \* $p < 0.05$ ; \*\* $p < 0.01$ ; \*\*\* $p < 0.005$ .

(C-F) Quantification of H&E and immunofluorescent staining in Fig. 5D-I. Data are mean  $\pm$  SD. \* $p < 0.05$ ; \*\* $p < 0.01$ ; \*\*\* $p < 0.005$ ; ns: not significant.

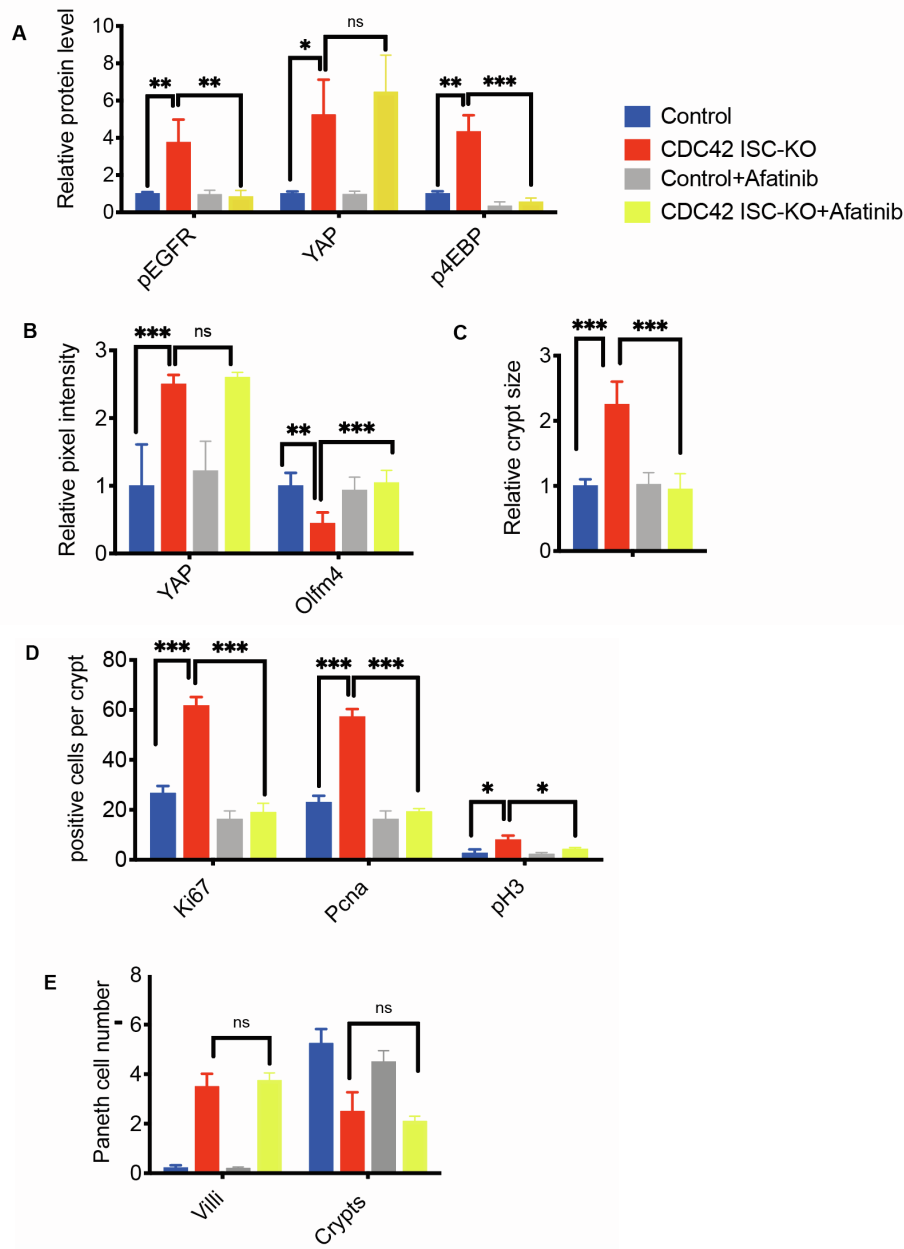

**Supplemental Figure 6. Inhibition of Ereg by Afatinib rescues ISC and reduces TA cell population. Related to Figure 6**

(A) Quantification of western blot in Fig. 6A. \* $p < 0.05$ ; \*\* $p < 0.01$ ; \*\*\* $p < 0.005$ ; ns: not significant.

(B-E) Quantification of H&E and immunofluorescent in Fig. 6C-H. Data are mean  $\pm$  SD. \* $p < 0.05$ ; \*\* $p < 0.01$ ; \*\*\* $p < 0.005$ ; ns: not significant.

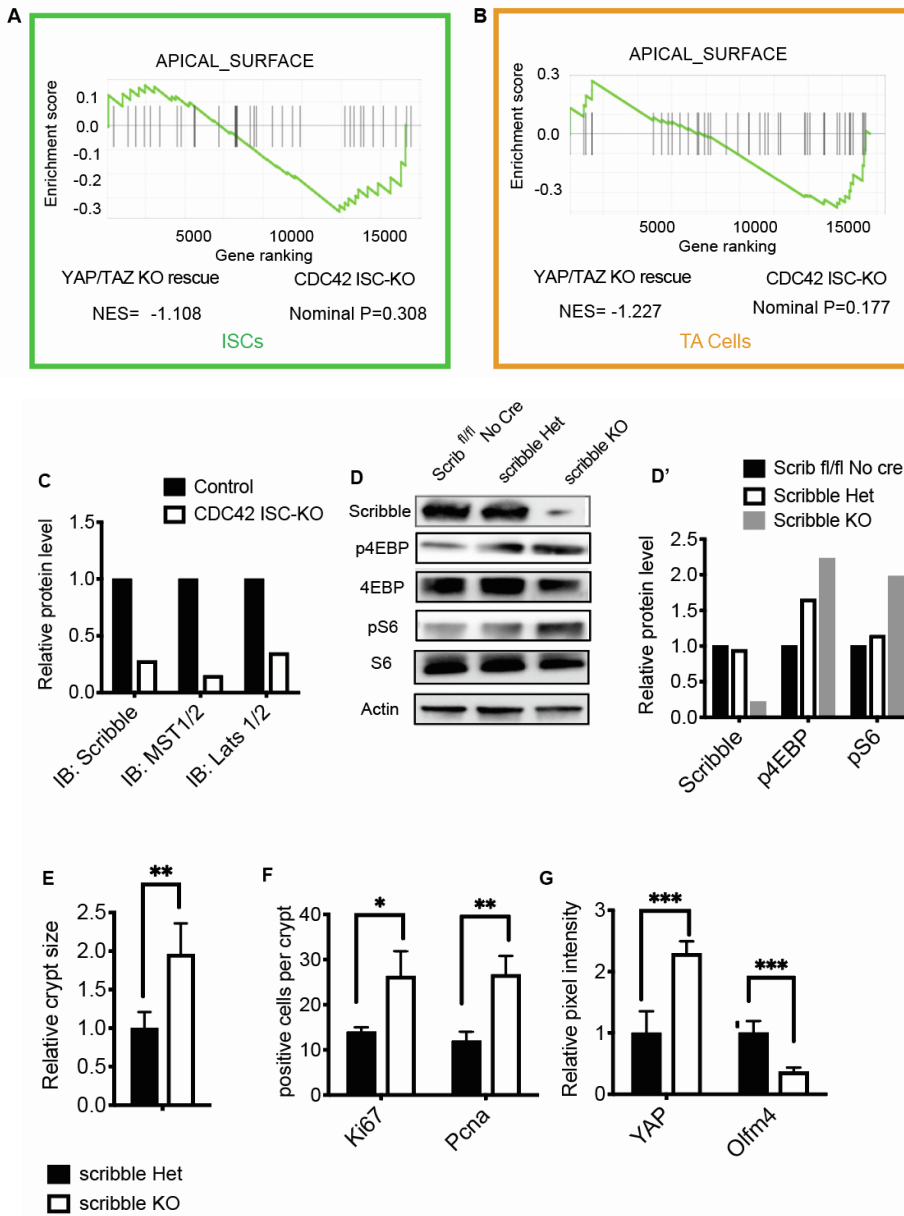

**Supplemental Figure 7. Loss of CDC42 disrupts polarity, and loss of scribble crypts has elevated mTOR activity. Related to Figure 7**

(A, B) GSEA pathway enrichment map for apical polarity pathways in YAP KO/TAZ Het rescue ISC and TA cell clusters.

(C) Quantification of western blot in Fig. 7D, E.

(D) Western Blotting of scribble, p4EBP, 4EBP, pS6, and S6 in in isolated small intestinal crypts, and quantification (representative of two independent repeats).

(E-G) Quantification of H&E and immunofluorescent staining in Fig. 7F-K. Data are mean  $\pm$  SD. \*p < 0.05; \*\*p < 0.01; \*\*\*p < 0.005



| Primers for qPCR |               |               |
|------------------|---------------|---------------|
| ctgf:            | Thermo Fisher | Mm01192933_g1 |
| cyr61            | Thermo Fisher | Mm00487499_g1 |
| ereg             | Thermo Fisher | Mm00514794_m1 |
| cdc42            | Thermo Fisher | Mm01194005_g1 |
| beta-actin       | Thermo Fisher | Mm02619580_g1 |
| yap1             | Thermo Fisher | Mm01143263_m1 |
| taz              | Thermo Fisher | Mm00504978_m1 |
| lgr5             | Thermo Fisher | Mm00438890_m1 |
| olfm4            | Thermo Fisher | Mm01320260_m1 |
| ascl2            | Thermo Fisher | Mm01268891_g1 |
| pcna             | Thermo Fisher | Mm00448100_g1 |
| axin2            | Thermo Fisher | Mm00443610_m1 |
| cyclin D1        | Thermo Fisher | Mm00432359_m1 |
| mki67            | Thermo Fisher | Mm01278617_m1 |
| cdk4             | Thermo Fisher | Mm00726334_s1 |
| mcm5             | Thermo Fisher | Mm00484840_m1 |
| mcm6             | Thermo Fisher | Mm00484848_m1 |

**Supplemental Table 1** **Related to Key Resource Table**
